# Supplementary material for: The intracellular domain of homomeric glycine receptors modulates agonist efficacy
Source: PubMed Central journal article supplement (PMC7995613; doi:10.1074/jbc.ra119.012358), 2021-02-20
Supplement: mmc1.pdf [file mmc1.pdf]

## **The intracellular domain of homomeric glycine receptors modulates agonist efficacy**

Josip Ivica<sup>1</sup>, Remigijus Lape<sup>1</sup>, Vid Jazbec<sup>2</sup>, Jie Yu<sup>3</sup>, Hongtao Zhu<sup>3</sup>, Eric Gouaux<sup>4</sup>, Matthew G. Gold<sup>1</sup> and Lucia G. Sivilotti<sup>1\*</sup>

From the <sup>1</sup>Department of Neuroscience, Physiology and Pharmacology, Division of Biosciences, University College London, Gower St, London WC1E 6BT, United Kingdom; <sup>2</sup>Department of Synthetic Biology and Immunology, National Institute of Chemistry, Hajdrihova 19, 1000 Ljubljana, Slovenia. <sup>3</sup>Vollum Institute, Oregon Health & Science University, Portland, Oregon 97239, USA, <sup>4</sup>Howard Hughes Medical Institute, Oregon Health & Science University, Portland, Oregon 97239, USA.

### **Supporting Information**

**Figure S1**

**Figure S2**

**Table S1**

|                                          | Signal peptide                                                  |     |
|------------------------------------------|-----------------------------------------------------------------|-----|
| human $\alpha 1$ GlyR                    | MYSFNTLRRLYLWETIVFFSLAASKEAEAARSAPKPMSPSDFLDKLMGRTSGYDARIRPNF   | 60  |
| zebrafish $\alpha 1$ GlyR                | ---MFALGIYLWETIVFFSLAASQAAA-ARKAASPMPPSEFLDKLMGKVSVDARIRPNF     | 56  |
| zebrafish $\alpha 1$ GlyREM              | ---MFALGIYLWETIVFFSLAASQAAA-A-----PSEFLDKLMGKVSVDARIRPNF        | 48  |
| zebrafish $\alpha 1$ GlyR $\Delta$ ICD   | ---MFALGIYLWETIVFFSLAASQAAA-ARKAASPMPPSEFLDKLMGKVSVDARIRPNF     | 56  |
| human $\alpha 1$ GlyR $\Delta$ ICD       | MYSFNTLRRLYLWETIVFFSLAASKEAEAARSAPKPMSPSDFLDKLMGRTSGYDARIRPNF   | 60  |
| hu $\alpha 1$ GlyR $\Delta$ ICD + zf TM4 | MYSFNTLRRLYLWETIVFFSLAASKEAEAARSAPKPMSPSDFLDKLMGRTSGYDARIRPNF   | 60  |
|                                          | # # # # # #                                                     |     |
| human $\alpha 1$ GlyR                    | KGPPVNVSCNIFINSFGSIAETTM DYRVNIFLRQQWNDPRLAYNEYPDSDLDDPSMLDS    | 120 |
| zebrafish $\alpha 1$ GlyR                | KGPPVNVTCNIFINSFGSIAETTM DYRVNIFLRQQWNDPRLAYSEYPDSDLDDPSMLDS    | 116 |
| zebrafish $\alpha 1$ GlyREM              | KGPPVNVTCNIFINSFGSIAETTM DYRVNIFLRQQWNDPRLAYSEYPDSDLDDPSMLDS    | 108 |
| zebrafish $\alpha 1$ GlyR $\Delta$ ICD   | KGPPVNVTCNIFINSFGSIAETTM DYRVNIFLRQQWNDPRLAYSEYPDSDLDDPSMLDS    | 116 |
| human $\alpha 1$ GlyR $\Delta$ ICD       | KGPPVNVSCNIFINSFGSIAETTM DYRVNIFLRQQWNDPRLAYNEYPDSDLDDPSMLDS    | 120 |
| hu $\alpha 1$ GlyR $\Delta$ ICD + zf TM4 | KGPPVNVSCNIFINSFGSIAETTM DYRVNIFLRQQWNDPRLAYNEYPDSDLDDPSMLDS    | 120 |
|                                          | # #                                                             |     |
| human $\alpha 1$ GlyR                    | IWKPDLLFANEKGAHFHEITTDNKLRLRISRNGNVLYSIRITLTLACPMDLKNFPMDVQTC   | 180 |
| zebrafish $\alpha 1$ GlyR                | IWKPDLLFANEKGANFHEVTDNKLRLRISKNGNVLYSIRITLVLACPMDLKNFPMDVQTC    | 176 |
| zebrafish $\alpha 1$ GlyREM              | IWKPDLLFANEKGANFHEVTDNKLRLRISKNGNVLYSIRITLVLACPMDLKNFPMDVQTC    | 168 |
| zebrafish $\alpha 1$ GlyR $\Delta$ ICD   | IWKPDLLFANEKGANFHEVTDNKLRLRISKNGNVLYSIRITLVLACPMDLKNFPMDVQTC    | 176 |
| human $\alpha 1$ GlyR $\Delta$ ICD       | IWKPDLLFANEKGAHFHEITTDNKLRLRISRNGNVLYSIRITLTLACPMDLKNFPMDVQTC   | 180 |
| hu $\alpha 1$ GlyR $\Delta$ ICD + zf TM4 | IWKPDLLFANEKGAHFHEITTDNKLRLRISRNGNVLYSIRITLTLACPMDLKNFPMDVQTC   | 180 |
|                                          | # # # #                                                         |     |
| human $\alpha 1$ GlyR                    | IMQLESFGYTMNDLIFEWQEQGAVQVADGLTLPQFILKEEKDLRYCTKHYNIGKFTCIEA    | 240 |
| zebrafish $\alpha 1$ GlyR                | IMQLESFGYTMNDLIFEWDEKQAVQVADGLTLPQFILKEEKDLRYCTKHYNIGKFTCIEA    | 236 |
| zebrafish $\alpha 1$ GlyREM              | IMQLESFGYTMNDLIFEWDEKQAVQVADGLTLPQFILKEEKDLRYCTKHYNIGKFTCIEA    | 228 |
| zebrafish $\alpha 1$ GlyR $\Delta$ ICD   | IMQLESFGYTMNDLIFEWDEKQAVQVADGLTLPQFILKEEKDLRYCTKHYNIGKFTCIEA    | 236 |
| human $\alpha 1$ GlyR $\Delta$ ICD       | IMQLESFGYTMNDLIFEWQEQGAVQVADGLTLPQFILKEEKDLRYCTKHYNIGKFTCIEA    | 240 |
| hu $\alpha 1$ GlyR $\Delta$ ICD + zf TM4 | IMQLESFGYTMNDLIFEWQEQGAVQVADGLTLPQFILKEEKDLRYCTKHYNIGKFTCIEA    | 240 |
|                                          | # #                                                             |     |
|                                          | TM1 TM2                                                         |     |
| human $\alpha 1$ GlyR                    | RFHLERQMGYYLIQMYIPSLLVILVLSWVSWINMDAAPARVGLGITTTLTMTTQSSGSR     | 300 |
| zebrafish $\alpha 1$ GlyR                | RFHLERQMGYYLIQMYIPSLLVILVLSWVSWINMDAAPARVGLGITTTLTMTTQSSGSR     | 296 |
| zebrafish $\alpha 1$ GlyREM              | RFHLERQMGYYLIQMYIPSLLVILVLSWVSWINMDAAPARVGLGITTTLTMTTQSSGSR     | 288 |
| zebrafish $\alpha 1$ GlyR $\Delta$ ICD   | RFHLERQMGYYLIQMYIPSLLVILVLSWVSWINMDAAPARVGLGITTTLTMTTQSSGSR     | 296 |
| human $\alpha 1$ GlyR $\Delta$ ICD       | RFHLERQMGYYLIQMYIPSLLVILVLSWVSWINMDAAPARVGLGITTTLTMTTQSSGSR     | 300 |
| hu $\alpha 1$ GlyR $\Delta$ ICD + zf TM4 | RFHLERQMGYYLIQMYIPSLLVILVLSWVSWINMDAAPARVGLGITTTLTMTTQSSGSR     | 300 |
|                                          | #                                                               |     |
|                                          | TM3 ICD                                                         |     |
| human $\alpha 1$ GlyR                    | SLPKVSVYKAIIDIMWAVCLLFFVFSALLEYA AVNFVSRQHKE LLRFRRRRRHKEDEAGEG | 360 |
| zebrafish $\alpha 1$ GlyR                | SLPKVSVYKAIIDIMWAVCLLFFVFSALLEYA AVNFVSRQHKE LLRFRRRRRHKEDEAGDG | 356 |
| zebrafish $\alpha 1$ GlyREM              | SLPKVSVYKAIIDIMWAVCLLFFVFSALLEYA AVNFVSR-----AGT-----           | 327 |
| zebrafish $\alpha 1$ GlyR $\Delta$ ICD   | SLPKVSVYKAIIDIMWAVCLLFFVFSALLEYA AVNFVSR-----AGT-----           | 335 |
| human $\alpha 1$ GlyR $\Delta$ ICD       | SLPKVSVYKAIIDIMWAVCLLFFVFSALLEYA AVNFVSR-----AGT-----           | 339 |
| hu $\alpha 1$ GlyR $\Delta$ ICD + zf TM4 | SLPKVSVYKAIIDIMWAVCLLFFVFSALLEYA AVNFVSR-----AGT-----           | 339 |
|                                          | ##                                                              |     |
|                                          | TM4                                                             |     |
| human $\alpha 1$ GlyR                    | RFNFSAYGMGPAQLQAKDGSVKGANNSTNTNPPAPSKSPEEMRKLFIQRAKKIDKISR      | 420 |
| zebrafish $\alpha 1$ GlyR                | RFSFAAYGMGPAQLQAKDGMAIKGNNNNAPTST-NPPEKTVEEMRKLFI SRAKRIDTVSR   | 415 |
| zebrafish $\alpha 1$ GlyREM              | -----KLFISRAKRIDTVSR                                            | 343 |
| zebrafish $\alpha 1$ GlyR $\Delta$ ICD   | -----KLFISRAKRIDTVSR                                            | 351 |
| human $\alpha 1$ GlyR $\Delta$ ICD       | -----KLFIQRAKKIDKISR                                            | 355 |
| hu $\alpha 1$ GlyR $\Delta$ ICD + zf TM4 | -----KLFISRAKRIDTVSR                                            | 355 |
|                                          | # # #                                                           |     |
|                                          | C-term                                                          |     |
| human $\alpha 1$ GlyR                    | IGFPM AFLIFNMFYWIYKIVRREDVHNQ                                   | 449 |
| zebrafish $\alpha 1$ GlyR                | VAFPLVFLIFNIFYWITYKIIRSEDIHKQ                                   | 444 |
| zebrafish $\alpha 1$ GlyREM              | VAFPLVFLIFNIFYWITYKLVPRGS---                                    | 368 |
| zebrafish $\alpha 1$ GlyR $\Delta$ ICD   | VAFPLVFLIFNIFYWITYKIIRSEDIHKQ                                   | 380 |
| human $\alpha 1$ GlyR $\Delta$ ICD       | IGFPM AFLIFNMFYWIYKIVRREDVHNQ                                   | 384 |
| hu $\alpha 1$ GlyR $\Delta$ ICD + zf TM4 | VAFPLVFLIFNIFYWITYKIIRSEDIHKQ                                   | 384 |
|                                          | ## ## # # # #                                                   |     |

**Figure S 1. Clustal W alignment of GlyR constructs used in this work.** Differences between human  $\alpha 1$  GlyR and zebrafish  $\alpha 1$  GlyR outside the ICD are marked with #. The amino acids involved in glycine binding are highlighted in green. The AGT linker used to replace the native ICD in some of the GlyR constructs is the same as used by Du et al. for zebrafish  $\alpha 1$  GlyR<sub>EM</sub> and is highlighted in yellow (1).

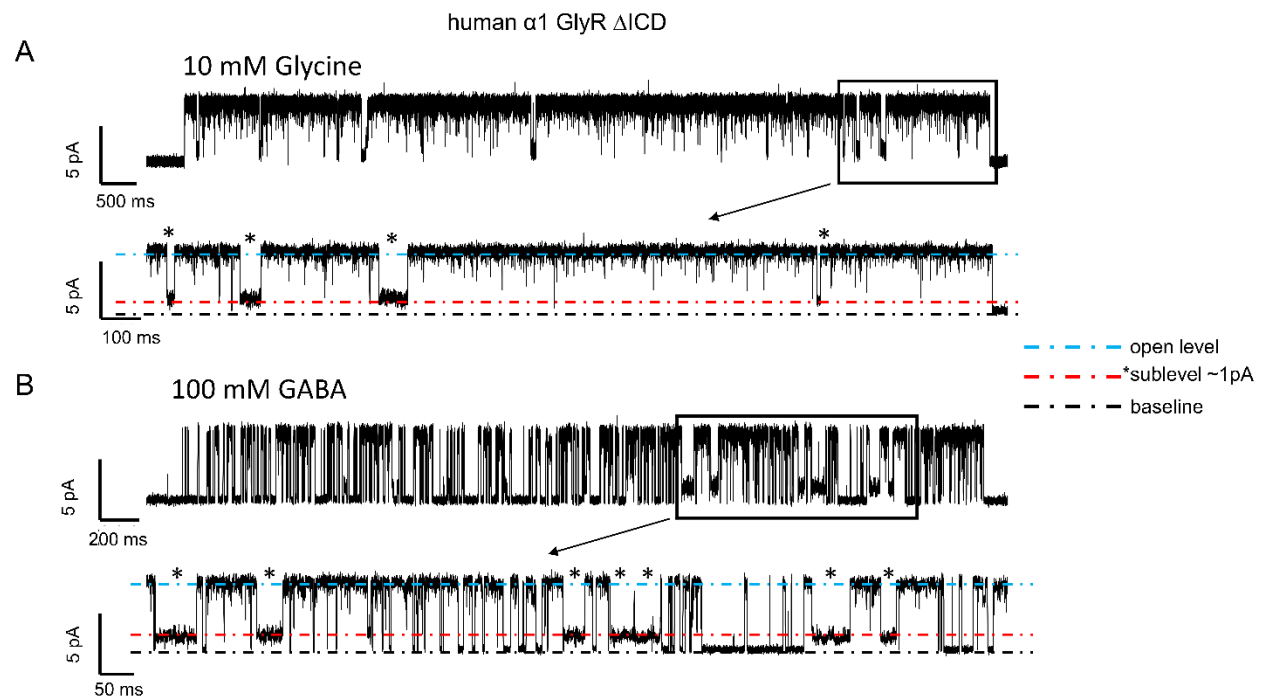

**Figure S 2. Sublevel of amplitude observed in human  $\alpha 1$  GlyR  $\Delta$ ICD.** A Cluster of single channel activity evoked by saturating concentration of Glycine (top trace). The area enclosed with a rectangle is presented in the bottom trace. The events that are not reaching full closure are annotated with \*. B) Cluster of single channel activity evoked by saturating concentration of GABA (top trace). The area enclosed with a rectangle is presented in the bottom trace. The events that are not reaching full closure are annotated with \*.

**Table S 1. Pairwise comparison of parameters from whole-cell and single-channel recording.** P values are estimated using two tail randomization test (10000 randomization iterations).

| GlyR pair                                                                                                                          | parameter            | Agonist (p value) |                   |                   |         |
|------------------------------------------------------------------------------------------------------------------------------------|----------------------|-------------------|-------------------|-------------------|---------|
|                                                                                                                                    |                      | GABA              | Taurine           | Balanine          | Glycine |
| <b>human <math>\alpha 1</math> GlyR &amp; zebrafish <math>\alpha 1</math> GlyR<sub>EM</sub></b>                                    | EC <sub>50</sub>     | <10 <sup>-4</sup> | 0.0004            | 0.0006            | 0.0010  |
|                                                                                                                                    | I <sub>rel</sub>     | <10 <sup>-4</sup> | <10 <sup>-4</sup> | <10 <sup>-4</sup> | /       |
|                                                                                                                                    | maxP <sub>oepn</sub> | <10 <sup>-4</sup> | <10 <sup>-4</sup> | <10 <sup>-4</sup> | 0.3396  |
| <b>human <math>\alpha 1</math> GlyR &amp; human <math>\alpha 1</math> GlyR <math>\Delta</math> ICD</b>                             | EC <sub>50</sub>     | 0.0093            | 0.0146            | 0.0235            | 0.0049  |
|                                                                                                                                    | I <sub>rel</sub>     | 0.0001            | <10 <sup>-4</sup> | 0.0061            | /       |
|                                                                                                                                    | maxP <sub>oepn</sub> | <10 <sup>-4</sup> | <10 <sup>-4</sup> | 0.0004            | 0.3397  |
| <b>zebrafish <math>\alpha 1</math> GlyR &amp; zebrafish <math>\alpha 1</math> GlyR<sub>EM</sub></b>                                | EC <sub>50</sub>     | <10 <sup>-4</sup> | 0.0037            | 0.0344            | 0.0111  |
|                                                                                                                                    | I <sub>rel</sub>     | <10 <sup>-4</sup> | 0.0008            | 0.0003            | /       |
|                                                                                                                                    | maxP <sub>open</sub> | <10 <sup>-4</sup> | <10 <sup>-4</sup> | 0.0503            | 0.2548  |
| <b>human <math>\alpha 1</math> GlyR &amp; zebrafish <math>\alpha 1</math> GlyR</b>                                                 | EC <sub>50</sub>     | 0.0006            | 0.0004            | 0.0003            | 0.1384  |
|                                                                                                                                    | I <sub>rel</sub>     | <10 <sup>-4</sup> | 0.0266            | 0.0143            | /       |
|                                                                                                                                    | maxP <sub>oepn</sub> | <10 <sup>-4</sup> | <10 <sup>-4</sup> | 0.0006            | 0.6696  |
| <b>human <math>\alpha 1</math> GlyR <math>\Delta</math> ICD &amp; zebrafish <math>\alpha 1</math> GlyR<sub>EM</sub></b>            | EC <sub>50</sub>     | <10 <sup>-4</sup> | 0.0002            | 0.0014            | 0.0084  |
|                                                                                                                                    | I <sub>rel</sub>     | <10 <sup>-4</sup> | 0.0036            | 0.0004            | /       |
|                                                                                                                                    | maxP <sub>oepn</sub> | <10 <sup>-4</sup> | 0.0203            | 0.0151            | 0.1084  |
| <b>human <math>\alpha 1</math> GlyR <math>\Delta</math> ICD &amp; hu<math>\alpha 1</math> GlyR <math>\Delta</math> ICD+ TM4 zf</b> | EC <sub>50</sub>     | 0.0009            | 0.9264            | 0.1040            | 0.0223  |
|                                                                                                                                    | I <sub>rel</sub>     | 0.2456            | 0.7757            | 0.9124            | /       |
|                                                                                                                                    | maxP <sub>open</sub> | 0.6194            | 0.7895            | 0.2263            | 0.0054  |
| <b>zebrafish <math>\alpha 1</math> GlyR<sub>EM</sub> &amp; zebrafish <math>\alpha 1</math> GlyR <math>\Delta</math> ICD</b>        | maxP <sub>open</sub> | 0.8052            | 0.5591            | 0.6066            | 0.0454  |

## References

1. Du, J., Lu, W., Wu, S., Cheng, Y., and Gouaux, E. (2015) Glycine receptor mechanism elucidated by electron cryo-microscopy. *Nature* **526**, 224-229
